# Supplementary material for: Ramadan and gestational diabetes: maternal and neonatal outcomes
Source: PubMed Central journal article supplement (PMC8758603; doi:10.1007/s00592-021-01782-y), 2021-08-24
Supplement: 592_2021_1782_MOESM1_ESM.pdf [file 592_2021_1782_MOESM1_ESM.pdf]

**Supplementary Table1:** The demographic characteristics of the women not exposed to Ramadan (n=48) and those having had any exposure to Ramadan (n=297).\*

| N= 345                                  |             | All Ramadan coincided<br>outside the pregnancy<br>(n=48) | Ever exposed to<br>Ramadan (any days<br>coincided $\geq$ 1)<br>(n=297) | P value |
|-----------------------------------------|-------------|----------------------------------------------------------|------------------------------------------------------------------------|---------|
| <b>Maternal Demographics</b>            |             |                                                          |                                                                        |         |
| Ethnicity (%):                          | 1.Arab      | 35.4                                                     | 41.4                                                                   | p=0.5   |
|                                         | 2.Indian    | 52.1                                                     | 41.1                                                                   |         |
|                                         | 3.Asian     | 10.4                                                     | 9.4                                                                    |         |
|                                         | 4.Other     | 2.1                                                      | 8.1                                                                    |         |
| Age at pregnancy (years)                |             | 30.8 $\pm$ 4.5                                           | 31.3 $\pm$ 5.2                                                         | p=0.5   |
| Initial Weight (kg.)                    |             | 64.2 $\pm$ 10.9                                          | 66.3 $\pm$ 14.6                                                        | p=0.4   |
| Final Weight (kg.)                      |             | 75.6 $\pm$ 10.5                                          | 78.8 $\pm$ 14.2                                                        | p=0.1   |
| Weight gain during pregnancy (kg)       |             | 12.2 $\pm$ 6.3                                           | 12.2 $\pm$ 5.5                                                         | p=1.0   |
| Pre pregnancy BMI (kg/m <sup>2</sup> )  |             | 25.2 $\pm$ 4.3                                           | 26.4 $\pm$ 5.7                                                         | p=0.2   |
| Family History (%)                      |             | 67.3                                                     | 59.0                                                                   | p=0.3   |
| Parity(%):                              |             |                                                          |                                                                        | p=0.5   |
| 0 (Primip)                              |             | 44.0                                                     | 36.5                                                                   |         |
| 1                                       |             | 22.0                                                     | 28.0                                                                   |         |
| $\geq$ 2 (Multip)                       |             | 34.0                                                     | 35.5                                                                   |         |
| <b>GDM Diagnosis &amp; Intervention</b> |             |                                                          |                                                                        |         |
| OGTT<br>Results:                        | 0 minutes   | 4.8 $\pm$ 0.6                                            | 5.0 $\pm$ 0.9                                                          | p=0.2   |
|                                         | 60 minutes  | 10.0 $\pm$ 1.5                                           | 10.3 $\pm$ 1.7                                                         | p=0.2   |
|                                         | 120 minutes | 8.4 $\pm$ 1.5                                            | 8.7 $\pm$ 1.6                                                          | p=0.3   |
|                                         | AUC         | 995 $\pm$ 117                                            | 1017 $\pm$ 154                                                         | p=0.4   |
| Gestation at diagnosis of GDM (weeks)   |             | 24.3 $\pm$ 7.8                                           | 25.5 $\pm$ 6.3                                                         | p=0.2   |
| Insulin Treatment (%)                   |             | 56.9                                                     | 56.5                                                                   | p=0.9   |
| Gestation Insulin commenced (weeks)     |             | 28.9 $\pm$ 5.0                                           | 28.4 $\pm$ 6.4                                                         | p=0.7   |
| Maximum insulin dose (units)            |             | 34[18-54]                                                | 34[16-62]                                                              | P=0.9   |

\*Data are %; mean  $\pm$  SD; or median [IQR].

**Supplementary Table 2:** Relationship between Ramadan exposure in GDM and Neonatal outcomes LGA and SGA

| Analysis                                                   | LGA                                |          |          | SGA      |          |          |      |
|------------------------------------------------------------|------------------------------------|----------|----------|----------|----------|----------|------|
|                                                            | OR                                 | 95%CI    | P        | OR       | 95%CI    | P        |      |
| <b>Days exposure analysis</b>                              | Model 1*                           |          |          | Model 1* |          |          |      |
|                                                            | Never exposed to Ramadan           | Ref.     |          | Ref.     |          |          |      |
|                                                            | 1-10 days exposure                 | 0.1      | 0-100    | 0.9      | 0.1      | 0-100    | 0.9  |
|                                                            | 11-20 days exposure                | 0.7      | 0.07-6.8 | 0.7      | 1.0      | 0.2-4.5  | 0.9  |
|                                                            | 21-30 days exposure                | 1.6      | 0.4-5.3  | 0.5      | 0.4      | 0.1-1.1  | 0.08 |
|                                                            | Model 2¶                           |          |          | Model 2¶ |          |          |      |
|                                                            | Never exposed to Ramadan           | Ref.     |          | Ref.     |          |          |      |
|                                                            | 1-10 days exposure                 | 0.1      | 0-10     | 1.0      | 0.1      | 0-10     | 0.7  |
|                                                            | 11-20 days exposure                | 0.6      | 0.06-6.4 | 0.7      | 1.0      | 0.2-4.4  | 1.0  |
|                                                            | 21-30 days exposure                | 1.6      | 0.5-5.6  | 0.5      | 0.4      | 0.1-1.1  | 0.07 |
| <b>Hours exposure (duration of daily fasting) analysis</b> | Model 1*                           |          |          | Model 1* |          |          |      |
|                                                            | Never exposed to Ramadan           | Ref.     |          | Ref.     |          |          |      |
|                                                            | Fasting period/day >12 – 13 hours  | 1.0      | 0.2-6.4  | 1.0      | N/A      | N/A      | N/A  |
|                                                            | Fasting period/day >13 – 14 hours  | 1.1      | 0.3-4.8  | 0.9      | N/A      | N/A      | N/A  |
|                                                            | Fasting period/day >14 – 15 hours  | 1.5      | 0.3-7.1  | 0.6      | N/A      | N/A      | N/A  |
|                                                            | Fasting period/day >15 – 16 hours  | 2.2      | 0.6-8.5  | 0.2      | N/A      | N/A      | N/A  |
|                                                            | Model 2§                           |          |          | Model 2§ |          |          |      |
|                                                            | Never exposed to Ramadan           | Ref.     |          | Ref.     |          |          |      |
|                                                            | Fasting period/day >12 – 13 hours  | 0.4      | 0.02-5.1 | 0.4      | N/A      | N/A      | N/A  |
|                                                            | Fasting period/day >13 – 14 hours  | 0.6      | 0.08-3.9 | 0.6      | N/A      | N/A      | N/A  |
| Fasting period/day >14 – 15 hours                          | 2.8                                | 0.4-18.2 | 0.3      | N/A      | N/A      | N/A      |      |
| Fasting period/day >15 – 16 hours                          | 1.1                                | 0.2-6.2  | 0.9      | N/A      | N/A      | N/A      |      |
| <b>Trimester exposure analysis</b>                         | Model 1*                           |          |          | Model 1* |          |          |      |
|                                                            | Never exposed to Ramadan           | Ref.     |          | Ref.     |          |          |      |
|                                                            | 1 <sup>st</sup> Trimester exposure | 1.1      | 0.2-5.2  | 0.9      | 0.5      | 0.1-1.9  | 0.3  |
|                                                            | 2 <sup>nd</sup> Trimester exposure | 1.1      | 0.2-4.8  | 0.9      | 0.3      | 0.07-1.3 | 0.1  |
|                                                            | 3 <sup>rd</sup> Trimester exposure | 1.8      | 0.4-7.5  | 0.4      | 0.5      | 0.1-2.0  | 0.3  |
|                                                            | Model 2§                           |          |          | Model 2§ |          |          |      |
|                                                            | Never exposed to Ramadan           | Ref.     |          | Ref.     |          |          |      |
|                                                            | 1 <sup>st</sup> Trimester exposure | 0.5      | 0.05-4.7 | 0.5      | 0.6      | 0.1-2.6  | 0.5  |
| 2 <sup>nd</sup> Trimester exposure                         | 0.7                                | 0.09-5.1 | 0.7      | 0.2      | 0.04-1.2 | 0.08     |      |
| 3 <sup>rd</sup> Trimester exposure                         | 1.8                                | 0.3-12.0 | 0.5      | 0.5      | 0.1-2.3  | 0.4      |      |

\* Unadjusted model

¶ Adjusted for gestational age at delivery, gender, ethnicity, maternal age, and hypertensive disorders of pregnancy.

§ Adjusted for gestational age at delivery, gender, ethnicity, maternal age, mother weight gain, patient weight before pregnancy, and hypertensive disorders of pregnancy.

**Supplementary Table 3:** Relationship between Ramadan exposure in GDM and Birth weight

| Analysis                                                   | Birth weight                       |      |             |
|------------------------------------------------------------|------------------------------------|------|-------------|
|                                                            | T value                            | P    |             |
| <b>Days exposure analysis</b>                              | Model 1*                           |      |             |
|                                                            | Never exposed to Ramadan           | Ref. |             |
|                                                            | 1–10 days exposure                 | 0.6  | 0.5         |
|                                                            | 11-20 days exposure                | 0.8  | 0.4         |
|                                                            | 21-30 days exposure                | 1.2  | 0.2         |
|                                                            | Model 2§                           |      |             |
|                                                            | Never exposed to Ramadan           | Ref. |             |
|                                                            | 1–10 days exposure                 | 0.9  | 0.3         |
|                                                            | 11-20 days exposure                | -0.3 | 0.8         |
|                                                            | 21-30 days exposure                | 0.5  | 0.6         |
| <b>Hours exposure (duration of daily fasting) analysis</b> | Model 1*                           |      |             |
|                                                            | Never exposed to Ramadan           | Ref. |             |
|                                                            | Fasting period/day >12 – 13 hours  | -0.2 | 0.8         |
|                                                            | Fasting period/day >13 – 14 hours  | 0.5  | 0.6         |
|                                                            | Fasting period/day >14 – 15 hours  | 1.0  | 0.3         |
|                                                            | Fasting period/day >15 – 16 hours  | 2.0  | <b>0.05</b> |
|                                                            | Model 2§                           |      |             |
|                                                            | Never exposed to Ramadan           | Ref. |             |
|                                                            | Fasting period/day >12 – 13 hours  | 0.1  | 0.9         |
|                                                            | Fasting period/day >13 – 14 hours  | -0.3 | 0.8         |
| Fasting period/day >14 – 15 hours                          | 0.7                                | 0.5  |             |
| Fasting period/day >15 – 16 hours                          | 0.9                                | 0.4  |             |
| <b>Trimester exposure analysis</b>                         | Model 1*                           |      |             |
|                                                            | Never exposed to Ramadan           | Ref. |             |
|                                                            | 1 <sup>st</sup> Trimester exposure | 0.2  | 0.8         |
|                                                            | 2 <sup>nd</sup> Trimester exposure | 1.3  | 0.2         |
|                                                            | 3 <sup>rd</sup> Trimester exposure | 1.9  | 0.06        |
|                                                            | Model 2§                           |      |             |
|                                                            | Never exposed to Ramadan           | Ref. |             |
|                                                            | 1 <sup>st</sup> Trimester exposure | -0.8 | 0.5         |
| 2 <sup>nd</sup> Trimester exposure                         | 0.4                                | 0.7  |             |
| 3 <sup>rd</sup> Trimester exposure                         | 1.2                                | 0.2  |             |

\* Unadjusted model

§Adjusted for gestational age at delivery, gender, ethnicity, maternal age, mother weight gain, patient weight before pregnancy, and hypertensive disorders of pregnancy.
